# Supplementary material
Source: PubMed Central journal article supplement (PMC3241970)
Supplement: NIHMS337394-supplement-1.pdf [file NIHMS337394-supplement-1.pdf]

## **Online Supplement**

### **Body mass index-mortality paradox in hemodialysis: can it be explained by blood pressure?**

*Rajiv Agarwal M.D.*

Indiana University School of Medicine and Richard L. Roudebush Veterans Administration  
Medical Center, Indianapolis, IN



**Figure S1: Flow of participants.**

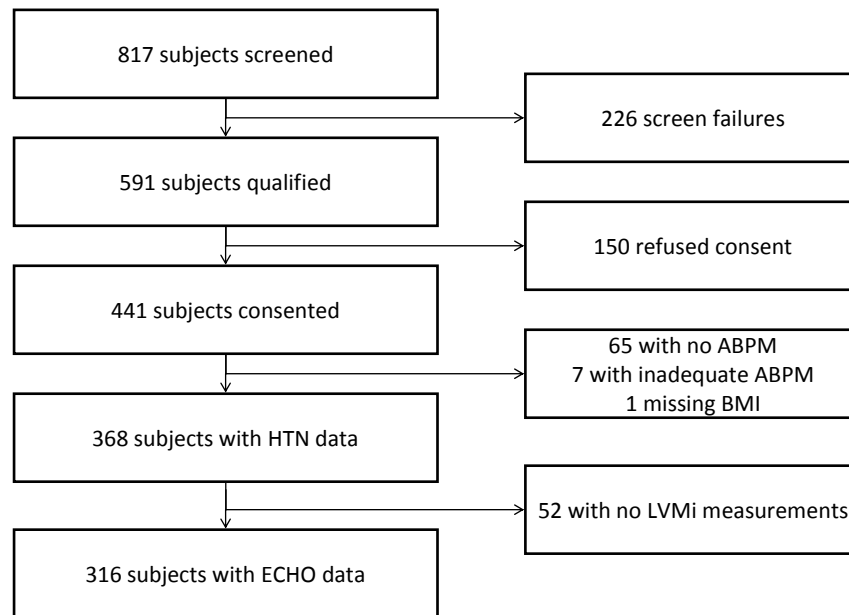

Of the 441 patients who consented, 1 was missing BMI, 7 had inadequate ambulatory BP recordings and 65 had none. These 368 patients who had measurements of both BMI and interdialytic ambulatory BP formed the study cohort: 316 (86%) of these also had echocardiographic data.
